# Supplementary material
Source: PubMed Central journal article supplement (PMC3988584)

Non-Stretched

Stretched

Red channel

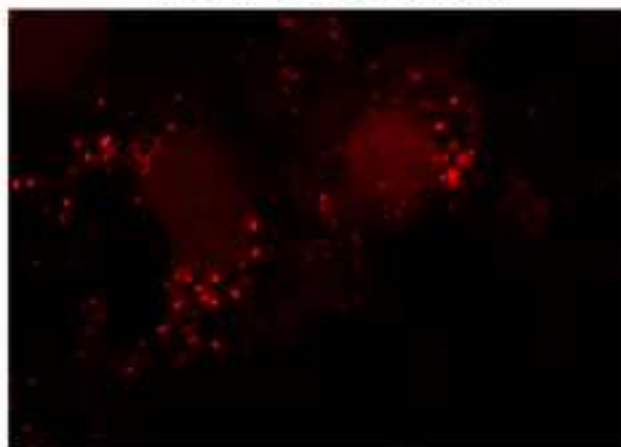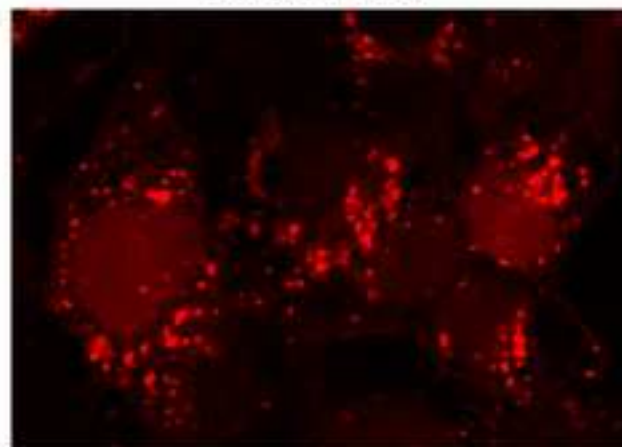

Green channel

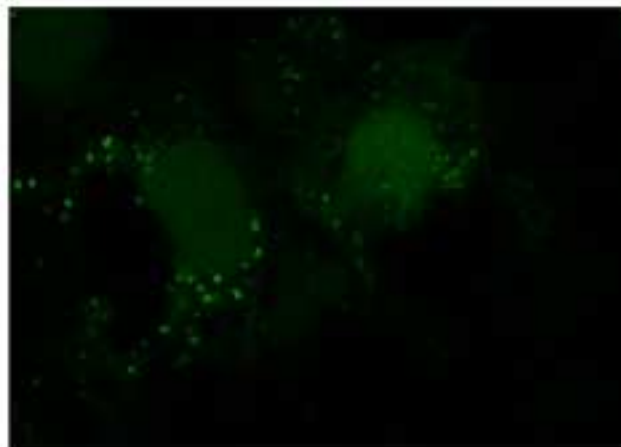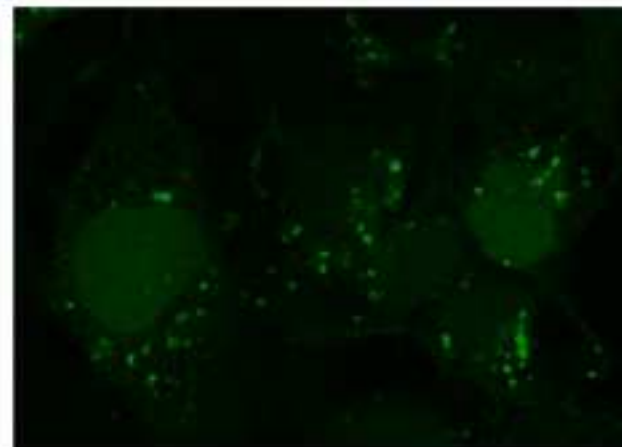

Co-localization

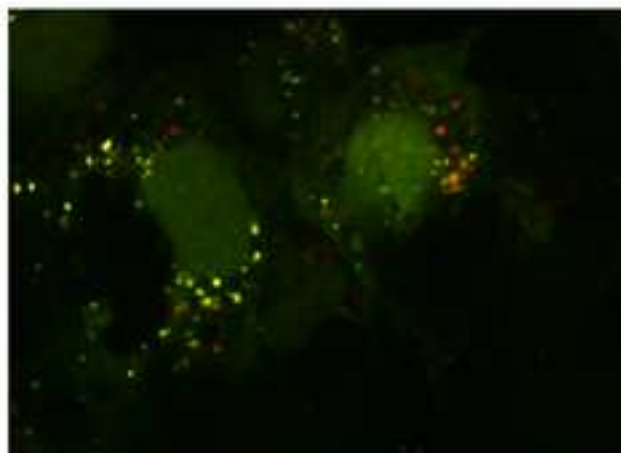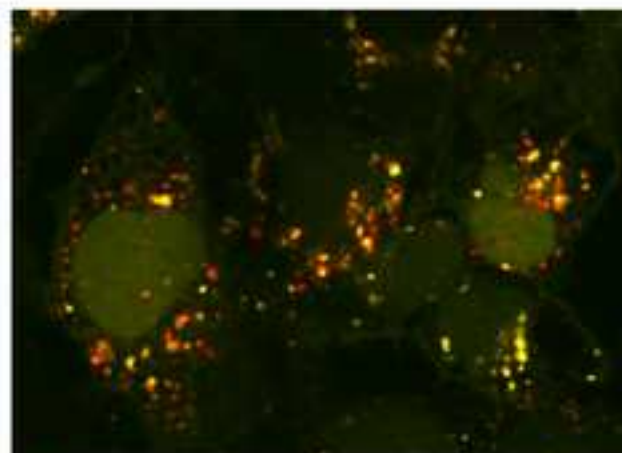

Find Edges

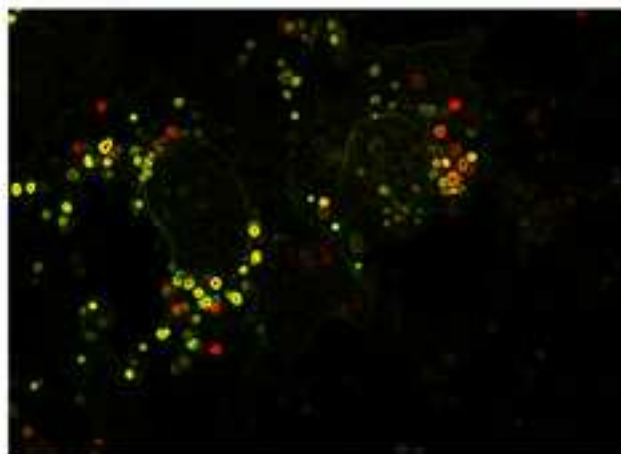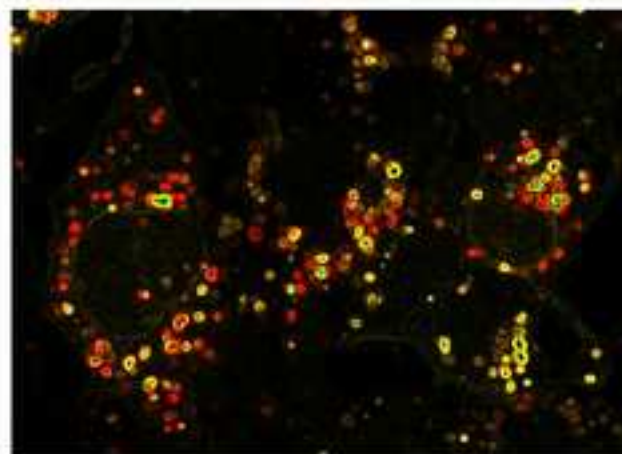

Supplement: NIHMS570778-supplement-01.pdf [file NIHMS570778-supplement-01.pdf]
